# Supplementary material
Source: publisher site journal article supplement (https://www.dovepress.com/article/243214)
Supplement: Supplementary file 1 [file get_supplementary_file.php]

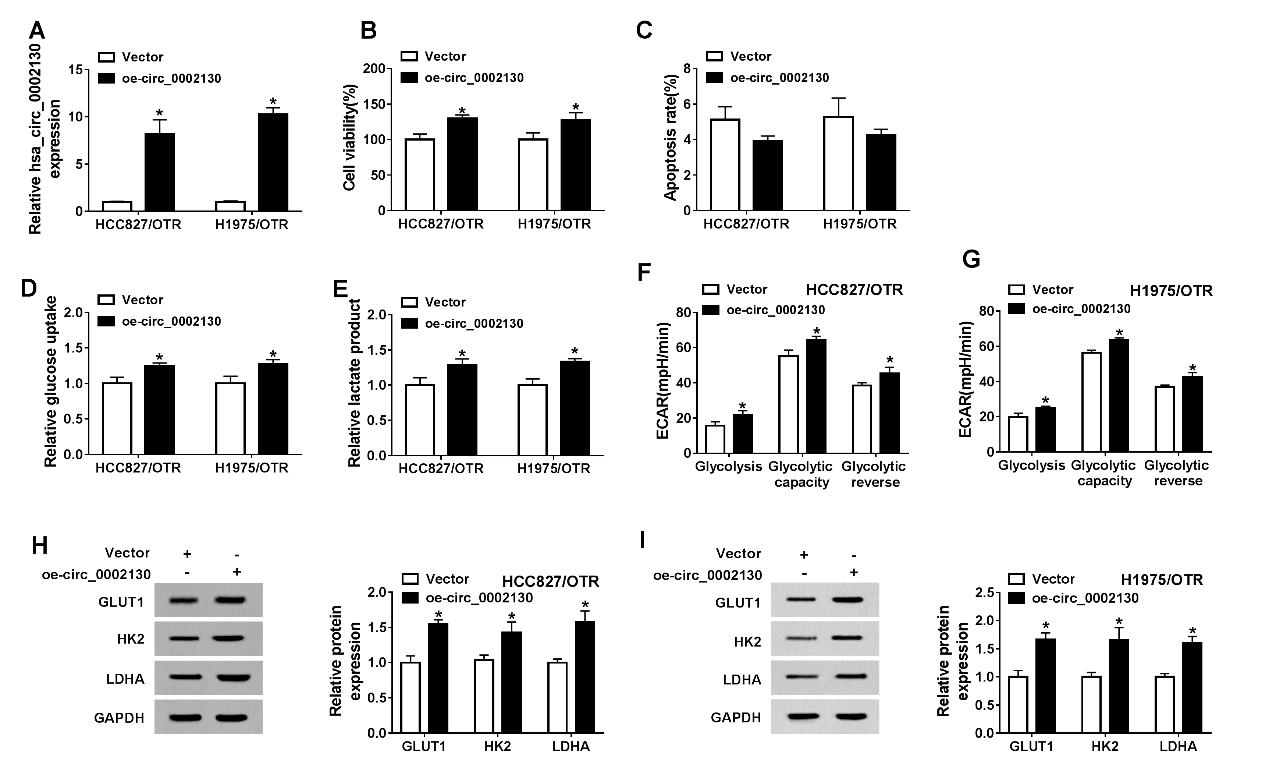


**Supplemental Fig. 1 Hsa_circ_0002130 overexpression promoted cell proliferation and glycolysis in osimertinib-resistant NSCLC cells.** HCC827/OTR and H1975/OTR cells were transfected with sh-NC or sh-circ #1. (A) The expression of hsa_circ_0002130 was detected by qRT-PCR. (B) Cell viability was measured by MTT assay. (C) Cell apoptosis was determined by flow cytometry analysis. (D-E) The levels of glucose uptake and lactate production were detected by glucose uptake colorimetric assay kit and lactate assay kit II, respectively. (F-G) The level of ECAR was examined by Seahorse Extracellular Flux Analyzer XF96 assay. (H-I) Western blot analysis was used to detect the protein expression of GLUT1, HK2 and LDHA. **P* < 0.05.
